# High-resolution ultrasound and speckle tracking: a non-invasive approach to assess *in vivo* gastrointestinal motility during development

Pierre Sicard<sup>1,2</sup>, Amandine Falco<sup>1</sup>, Sandrine Faure<sup>1</sup>, Jérôme Thireau<sup>1</sup>, Stéphanie E. Lindsey<sup>1,3</sup>, Norbert Chauvet<sup>1</sup> and Pascal de Santa Barbara<sup>1,\*</sup>

## ABSTRACT

Gastrointestinal motor activity has been extensively studied in adults; however, only few studies have investigated fetal motor skills. It is unknown when the gastrointestinal tract starts to contract during the embryonic period and how this function evolves during development. Here, we adapted a non-invasive high-resolution echography technique combined with speckle tracking analysis to examine the gastrointestinal tract motor activity dynamics during chick embryo development. We provided the first recordings of fetal gastrointestinal motility in living embryos without anesthesia. We found that, although gastrointestinal contractions appear very early during development, they become synchronized only at the end of the fetal period. To validate this approach, we used various pharmacological inhibitors and *BAPX1* gene overexpression *in vivo*. We found that the enteric nervous system determines the onset of the synchronized contractions in the stomach. Moreover, alteration of smooth muscle fiber organization led to an impairment of this functional activity. Altogether, our findings show that non-invasive high-resolution echography and speckle tracking analysis allows visualization and quantification of gastrointestinal motility during development and highlight the progressive acquisition of functional and coordinated gastrointestinal motility before birth.

**KEY WORDS:** Chick model, Gastrointestinal, Smooth muscle, Enteric nervous system, Ultrasound echography

## INTRODUCTION

In vertebrates, the gastrointestinal (GI) tract is essential for the absorption of water and nutrients. Early during embryo development, the GI tract is formed as a closed primitive and uniform tube, composed of endoderm and mesenchyme, that becomes regionalized along the anterior-posterior (AP) axis into various organs (esophagus, stomach, duodenum and intestines) (de Santa Barbara et al., 2002, 2003). The mesenchyme gives rise (from the outer to the inner part of the gut wall) to the longitudinal and circular smooth muscle layers, the submucosa and the muscularis mucosae, close to the epithelial lining (Le Guen et al., 2015). The circular and longitudinal smooth

muscle layers align in orthogonal orientations to ensure the gut coordinated contraction and relaxation (Huycke et al., 2019; Roberts, 2000). Concomitantly with these morphological events, the GI mesenchyme is colonized by neural crest-derived cells, a cell population that gives rise to the enteric nervous system (ENS), the intrinsic innervation of the GI tract (Burns et al., 2009). The ENS originates predominantly from vagal enteric neural crest-derived cells (vENCDCs) that delaminate from the neural tube, enter the esophageal mesenchyme and populate the entire GI tract, from the esophagus to the terminal colon, through an AP migration wave (Burns and Le Douarin, 1998; Burns et al., 2000; Fairman et al., 1995; Faure et al., 2015; Le Douarin and Teillet, 1973; Yntema and Hammond, 1954). During their migration, vENCDCs proliferate and differentiate into ENS neurons and glial cells. They form two concentric plexuses of ganglion cells: the myenteric plexuses are localized in the GI wall muscle layers and control smooth muscle contraction and relaxation (Bouret et al., 2017; Chevalier, 2018; Heanue et al., 2016), whereas the submucosal plexuses lie in the submucosa and innervate epithelial cells and muscularis mucosae (Uesaka et al., 2016).

Vertebrate GI motor activity has been extensively studied in adults, but rarely during embryo development. During the prenatal period, the human GI tract digests and absorbs nutrients from the amniotic fluid and propels the meconium (McLain, 1963). There are good clinical evidences that, in late gestation, fetal growth requires an intact and functional GI tract for swallowing the amniotic fluid and for the enteral uptake of nutrients (Koppen et al., 2017; Singendonk et al., 2014). Although fetal gastric peristalsis has been observed using ultrasound imaging in humans (Sase et al., 1999), little is known about when and how digestive motor skills appear and develop during development, mainly due to the limitations of *in vivo* embryo assessment. Until now, embryonic gut motility has been studied only in organ culture systems. However, depending on the GI segment and preparation method (open, tubular, muscle strips), the motility patterns and contractile behavior can be biased by the apparatus used to measure smooth muscle contractility (Barnes et al., 2014). Various invasive approaches using different dissected GI segments for organ culture showed that embryonic GI segments can contract autonomously or upon stimulation (Roberts et al., 2010). These studies demonstrated that the first contractile waves are due to spontaneous smooth muscle contractions (Chevalier, 2018; Roberts et al., 2010). The transition from uncoordinated to rhythmic motility patterns in the developing intestine has been associated with the activity of ENS (Chevalier et al., 2019; Roberts et al., 2010) and interstitial cells of Cajal (ICCs) (Chevalier et al., 2020), which are mesenchymal cells that have differentiated from digestive mesenchymal progenitors common to smooth muscle cells and ICCs (Lecoin et al., 1996; Young et al., 1996).

<sup>1</sup>PhyMedExp, University of Montpellier, INSERM, CNRS, 34295 Montpellier, France. <sup>2</sup>IPAM, Biocampus Montpellier, CNRS, INSERM, University of Montpellier, 34295 Montpellier, France. <sup>3</sup>Department of Mechanical and Aerospace Engineering, University of California San Diego (UCSD), La Jolla, CA 92093, USA.

\*Author for correspondence (pascal.de-santa-barbara@inserm.fr)

 P.S., 0000-0001-5837-3916; S.F., 0000-0002-8902-8274; P.d.S.B., 0000-0001-9040-2481

Handling Editor: James Wells

Received 7 February 2022; Accepted 18 July 2022

Therefore, a non-invasive *in vivo* approach that can reproducibly identify, quantify and follow GI motility during fetal development is needed to identify the implicated physiological key mechanism(s) and monitor the emergence of motility. This will allow scientists to understand how rhythmic motility patterns are set up and their alterations in infants with functional GI disorders (Martire et al., 2021; Thapar et al., 2018). Here, we used high-frequency ultrasound imaging and speckle tracking analysis to study GI motility in chick embryos. Compared with human/mouse embryos, the chick GI tract presents adaptive morphological differences (Smith et al., 2000). However, smooth muscle development and its colonization by ENS occur in the first third of the fetal period in human and chick embryos (Wallace and Burns, 2005; Faure et al., 2015; Bourret et al., 2017), whereas this colonization is not complete until the second third of development in mice (Heanue et al., 2016). Moreover, the main advantage of the chick embryo model is that it allows us to analyze directly by ultrasonography the digestive motility without being disturbed by the movement of the mother and without the use of anesthetics, which can influence the digestive motor activity (De Corte et al., 2012). With this method we could identify the *in vivo* early GI motility, its changes and functional profiles during chick embryo development. This approach, combined with pharmacological inhibitors of smooth muscle contraction and of ENS or ICC activity, allowed us to highlight the role of the ENS in stomach contraction synchronization *in vivo*. Moreover, by overexpressing the homeobox gene *BAPX1* (also known as *NKX3-2*) in the stomach mesenchyme *in vivo*, we demonstrated that smooth muscle fiber organization is essential for functional fetal GI motility.

## RESULTS

### Stomach contraction undergoes dynamic changes to reach coordinated patterns during chick embryo development

To enable the non-invasive *in vivo* investigation of the GI tract in chick embryos without need of anesthetics, we used the high-resolution echography imaging technique that was previously applied to monitor heart changes during chick embryo development (McQuinn et al., 2007). At embryonic day (E) 15, the latest stage we analyzed, we could visualize all embryonic GI segments (stomach, small intestine and colon) and their associated organs (liver, lung, pancreas). Besides the anatomical structures, we also monitored the stomach deformations (Fig. 1A, white arrows, dashed line) associated with the dynamic opening and closure of its lumen (Fig. 1A, red arrows; Movie 1). We observed these movements in small intestine and colon (Movie 2 & Movie 3) as well. We then used high-resolution echography to investigate the onset and changes of stomach motility during embryogenesis, from E8 to E15. We started our analyses at E8 because the digestive tract expresses digestive smooth muscle differentiation markers at this stage (Faure et al., 2015; Notarnicola et al., 2012). We could visualize the stomach structure at E8 and, unexpectedly, we observed stomach movements already at this stage (Fig. 1B, dashed line; Movie 4). After recording GI images for several minutes at 25 images/s, we analyzed the GI tract movements in the part of the movies where the whole chick embryo did not move and used the speckle tracking analysis software (VevoLab) to analyze them. Strain was defined as the relative change in length, and was determined with the formula  $\epsilon = (L - L_0) / L_0$  where  $L_0$  is the baseline length and  $L$  is the length at maximum contraction. Using this analysis, we generated a deformation map (3D strain) at E8 and quantified the stomach deformation (ranking from  $-9.5$  to  $+10.3$ ). We observed asynchronous deformations around the stomach

circumference, suggesting that contractions began in an uncoordinated manner (Fig. 1C). At E13 (Fig. 1B, dashed line; Movie 5), the magnitude of stomach deformation increased (from  $-24.7$  to  $+21.8$ ), but became increasingly confined to specific zones (Fig. 1C). At E15 (Fig. 1B, dashed line), the stomach deformation percentage was still elevated (from  $-8.7$  to  $+21.9$ ). Moreover, we observed that these deformations are regionalized (Fig. 1C), highlighting that stomach contraction evolves during development. Using high-resolution echography, we found that the stomach area increased rapidly (by 13-fold) between E8 and E15 (Fig. 1D): from  $2.33 \pm 0.71$  mm<sup>2</sup> mean  $\pm$  s.e.m.) at E8 to  $21.41 \pm 5.06$  mm<sup>2</sup> at E13 and  $30.47 \pm 3.8$  mm<sup>2</sup> at E15. To quantify stomach deformation changes between E8 and E15, we used the speckle-tracking strain curves obtained from high-resolution echography images. We quantified stomach motility asynchrony from the standard derivation of the maximum radial time-strain curves of the six gastric segments delineated in the developing stomach (Fig. 1E) and the time-strain curves generated for each segment by adapting a previously described synchrony index used to study peristalsis (Mittal et al., 2006). We found that asynchrony was very high at E8 ( $2092.58 \pm 1068.62$ ), decreased at E13 ( $930.79 \pm 337.01$ ), and was near the basal line ( $230.89 \pm 172.28$ ) at E15, indicating high movement synchronization at E15 (Fig. 1F). The asynchrony values at E13 and E15 were significantly different (Fig. 1F;  $P < 0.05$ , one-way ANOVA). Altogether, we demonstrated *in vivo* that the stomach dynamic contraction pattern changed to synchronized movements at E15.

### During development, colon and stomach motility coordination patterns appear later than in small intestine

Most previous studies on GI motility onset focused on the small intestine using organs isolated from mouse and chick embryos (Chevalier, 2018; Chevalier et al., 2020; Roberts et al., 2010). Using high-resolution echography, we could monitor the small intestine from E13 onwards, and we detected a rhythmic movement already at this stage (Fig. 2A,B, red arrows). The small intestine area increased from  $0.196 \pm 0.036$  mm<sup>2</sup> at E13 to  $0.406 \pm 0.069$  mm<sup>2</sup> at E15 (Fig. 2C;  $P < 0.05$ ). Using speckle tracking analysis, we measured the circumferential and radial small intestine strains (i.e. change in length over the original length) (Fig. 2D). The absence of a significant difference in the percentages of small intestine circumferential ( $16.37\% \pm 3.04$  at E13 and  $16.89\% \pm 4.12$  at E15) and radial ( $10.72\% \pm 2.74$  at E13 and  $11.88\% \pm 1.74$  at E15) strains indicated no change in the small intestine contraction between E13 and E15 (Fig. 2E). We then observed the colon lumen in the longitudinal orientation, and detected dynamic movements with the presence of rhythmic waves (Fig. 2F, red arrows; Movie 3). The colon diameter slightly increased from  $1.22 \pm 0.24$  mm at E13 to  $1.34 \pm 0.22$  mm at E15 (Fig. 2H, not significant). Using speckle tracking analysis, we measured the colon longitudinal strain (Fig. 2G), and found that the longitudinal deformation was significantly increased at E15 compared with E13 ( $1.63 \pm 0.78$  at E13 and  $4.35 \pm 0.97$  at E15) (Fig. 2H;  $P < 0.05$ ). Altogether, we showed efficient small intestine motility already at E13, whereas the colon motor skills continued to progress from E13 to E15.

### The enteric nervous system is implicated in fetal stomach contractions

To challenge our high-resolution echography approach and to determine the origin of stomach contractions, we developed an approach to deliver drugs that target specific cell types (smooth muscle cells (SMCs), enteric neurons and ICCs) found in the

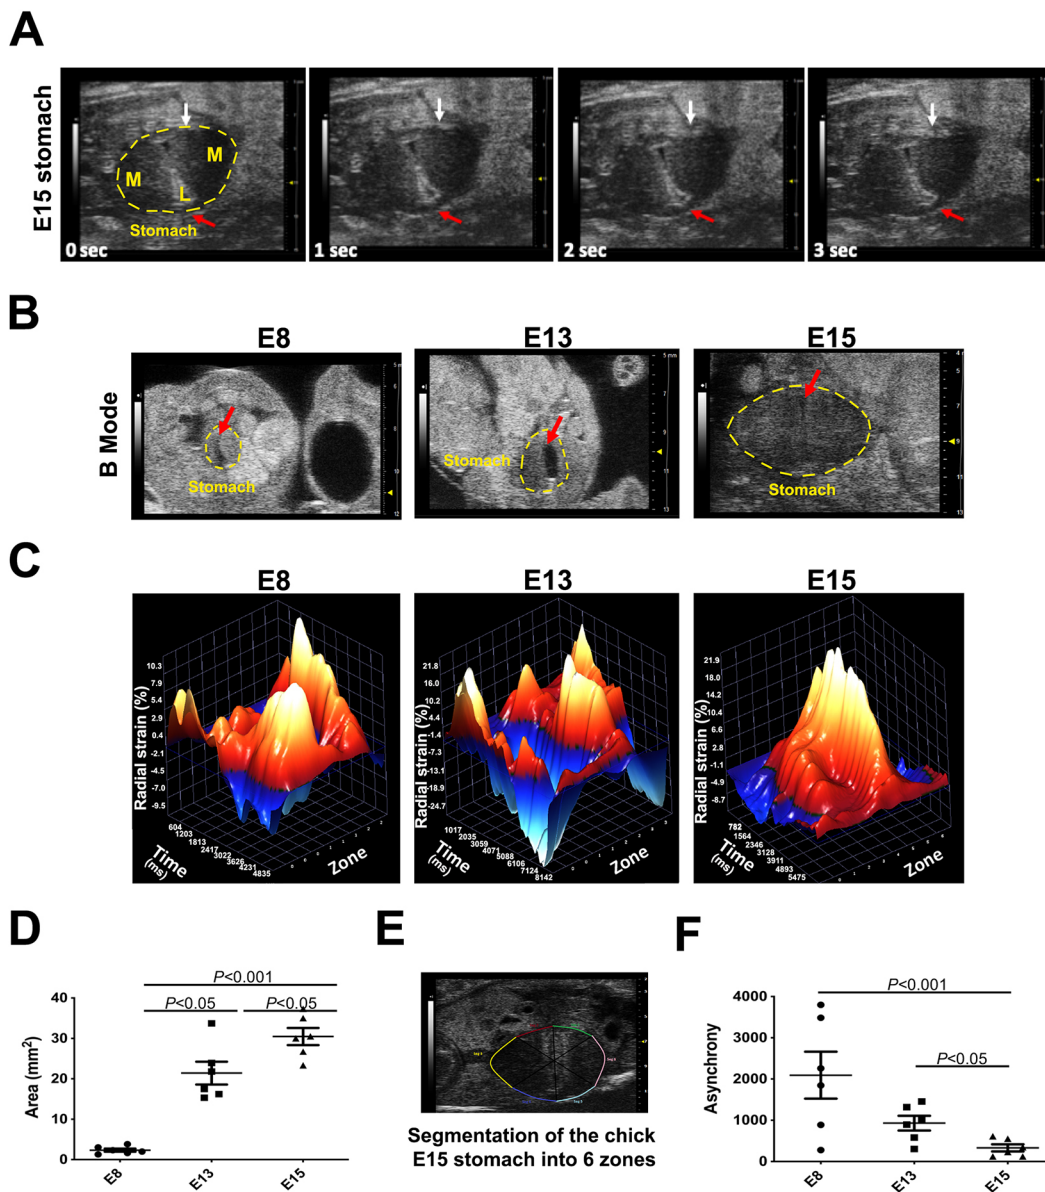

**Fig. 1. Dynamic contractile activity during fetal chick stomach development.** (A) Observation of stomach contractions *in vivo* using high-resolution echography in E15 chick embryos. Dashed line, E15 stomach; white arrows, muscle contraction waves; red arrows, lumen movement. (B) Stomach anatomy *in vivo* analysis using high-resolution echography at different stages of chick embryo development (E8, E13 and E15). Dashed lines, E8, E13 and E15 stomach; red arrows, stomach lumen. (C) 3D strain representation of the stomach contractile activity *in vivo* using high-resolution echography imaging data during chick embryo development (E8, E13 and E15). 3D heat map of the radial strain percentage (z) for each individual stomach segment (y) during 5–8 s of acquisition (x). (D) Quantification of the stomach area at the indicated developmental stages ( $n=6/\text{stage}$ ). (E) Segmentation of the chick embryo stomach into six zones to monitor deformation. (F) Evaluation of asynchrony at the indicated developmental stages ( $n=6/\text{stage}$ ). Data are mean $\pm$ s.e.m. One-way ANOVA with Tukey's multiple comparison test.

developing stomach musculature (Fig. 3A) to the GI lumen. Evans Blue solution directly deposited in the E15 chick embryo beak was observed 1 h later in the stomach lumen (Fig. S1). Using high-resolution echography, we monitored stomach contractions at E15 before drug delivery and 1 h after. As a control, we also determined the heart rate. We first evaluated the consequence of intra-oral saline solution (PBS) injection (negative control) and found that it altered neither the GI motility (velocity and radial displacement) nor the heart rate (Fig. S2A). Then, we used the inorganic calcium channel blocker cobalt chloride ( $\text{CoCl}_2$ ) that blocks extracellular  $\text{Ca}^{2+}$  entry through L-type voltage-dependent  $\text{Ca}^{2+}$  channels and receptor-operated channels.  $\text{CoCl}_2$  has been previously used to abolish the contraction of embryonic mouse and chick intestine in organ culture

(Roberts et al., 2010; Chevalier et al., 2017). Using speckle tracking analysis, we measured the circumferential and radial stomach strains (i.e. change in length over the original length) (Fig. 3B).  $\text{CoCl}_2$  led to a decrease in stomach circumferential velocity (from  $6.51\pm 1.69$  mm/sec before to  $2.82\pm 0.46$  mm/sec after treatment,  $P<0.05$ ) and radial displacement (from  $0.169\pm 0.065$  mm before to  $0.082\pm 0.05$  mm after treatment,  $P<0.05$ ) (Fig. 3C; Fig. S2B). Moreover, we confirmed that this approach specifically targets the stomach because the heart rate was not altered by  $\text{CoCl}_2$  [ $185.6\pm 10.8$  beats per minute (bpm) before and  $188.8\pm 7.3$  bpm after treatment, not significant] (Fig. 3C). These data demonstrated that the measured deformations were specific to the intrinsic stomach smooth muscle contractions. To evaluate ICC contribution

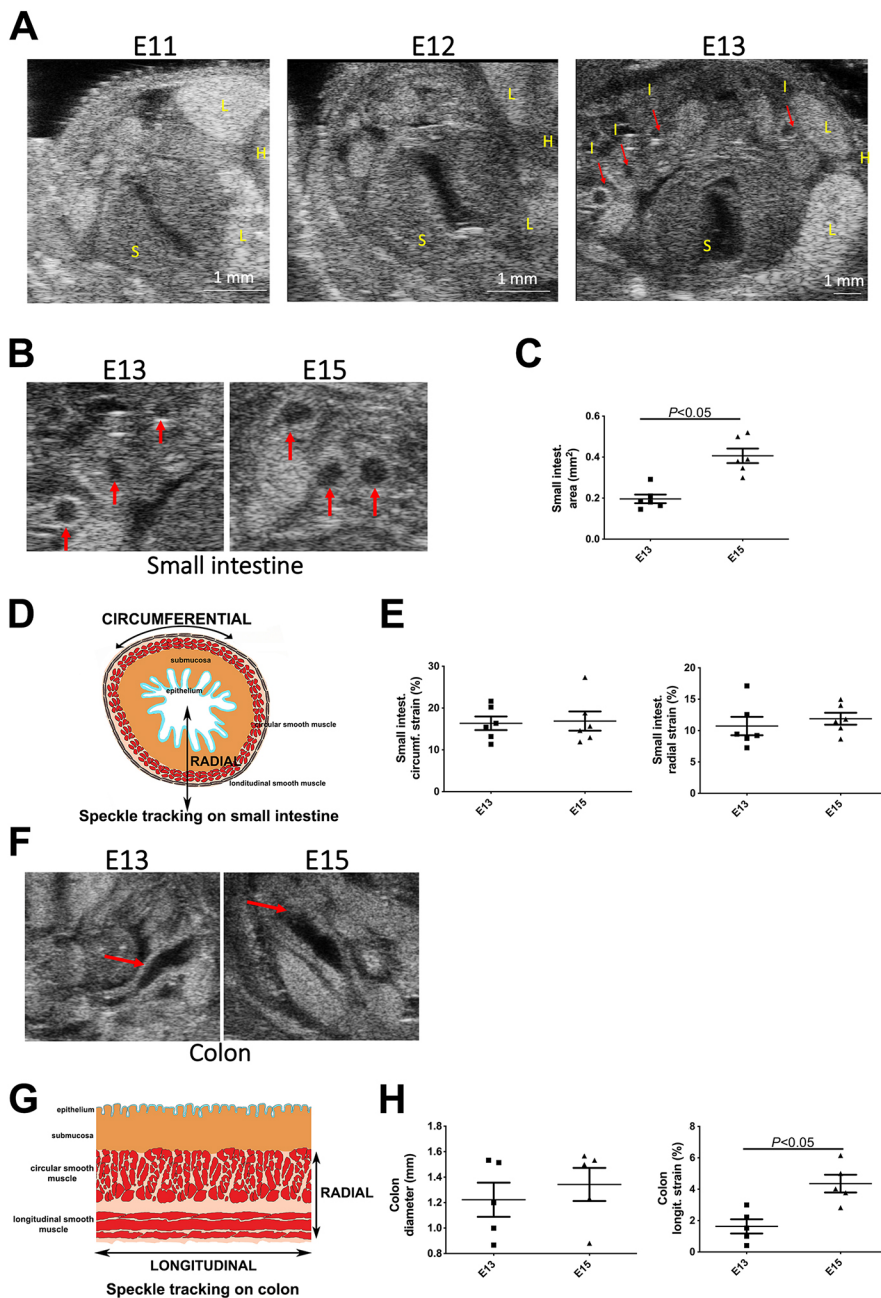

**Fig. 2. Dynamic contractile activity during chick embryo small intestine and colon development.** (A) Small intestine anatomy *in vivo* using high-resolution echography during chick embryo development: E11 (stage 37), E12 (stage 38) and E13 (stage 39). Red arrows, small intestine lumen. H, heart; I, small intestine; L, lung; S, stomach. (B) Small intestine anatomy by high-resolution echography at E13 and E15. Red arrows, small intestine lumen. (C) Quantification of the small intestine area at the indicated developmental stages ( $n=6$ /stage). (D) Schematic of the speckle tracking analysis of the small intestine during chick embryo development. (E) Quantification of small intestine circumferential and radial strains at the indicated developmental stages ( $n=6$ /stage). (F) Colon anatomy analysis by high-resolution echography at E13 and E15. Red arrows, colon lumen. (G) Schematic representation of the speckle tracking analysis of colon during chick embryo development. (H) Quantification of colon diameter and longitudinal strain at the indicated developmental stages ( $n=5$ /stage). Data are mean $\pm$ s.e.m. Unpaired two-tailed *t*-test.

to stomach contraction, we used imatinib to block ICC activity (Beckett et al., 2007; Chevalier et al., 2020; Kim et al., 2010; Popescu et al., 2006). After 1 h, the stomach circumferential velocity (from  $9.56\pm 1.04$  mm/sec before to  $3.03\pm 0.60$  mm/sec after treatment,  $P<0.0001$ ) and radial displacement (from  $0.237\pm 0.01$  mm before to  $0.064\pm 0.021$  mm after treatment,  $P<0.001$ ) were decreased (Fig. S2C), leading to stomach contraction inhibition. As imatinib also affected the heart rate, which decreased from  $212\pm 12$  bpm before to  $148.4\pm 24.7$  bpm after treatment, ( $P<0.05$ ), we could not conclude regarding ICC role in stomach contraction regulation. We next used the sodium neural channel blocker tetrodotoxin (TTX) to evaluate ENS contribution (Roberts et al., 2010; Chevalier et al., 2017). We found that TTX decreased the stomach circumferential velocity (from  $7.46\pm 1.25$  mm/s before to  $4.44\pm 1.88$  mm/s after treatment,  $P<0.05$ ) and radial displacement (from  $0.152\pm 0.058$  mm before

to  $0.032\pm 0.010$  mm after treatment,  $P<0.05$ ) (Fig. 3D; Fig. S2D), leading to stomach contraction inhibition. The heart rate remained constant ( $180.8\pm 16.6$  bpm before and  $183.6\pm 10.7$  bpm after treatment, not significant) (Fig. 3D). These data show that high-resolution echography can be used to monitor GI tract contractions *in vivo*, facilitating robust quantitative analysis. Moreover, using GI-targeted drug delivery, we found that at E15 the ENS contributes to stomach motility regulation.

#### Smooth muscle layer organization is essential for fetal stomach contraction coordination

The development of an approach to monitor digestive contractility *in vivo* opens the way to study the role of specific genes. BMP signaling activity is implicated in the development and differentiation of the digestive mesenchyme into smooth muscle (De Santa Barbara et al., 2005; Notarnicola et al., 2012). Upstream

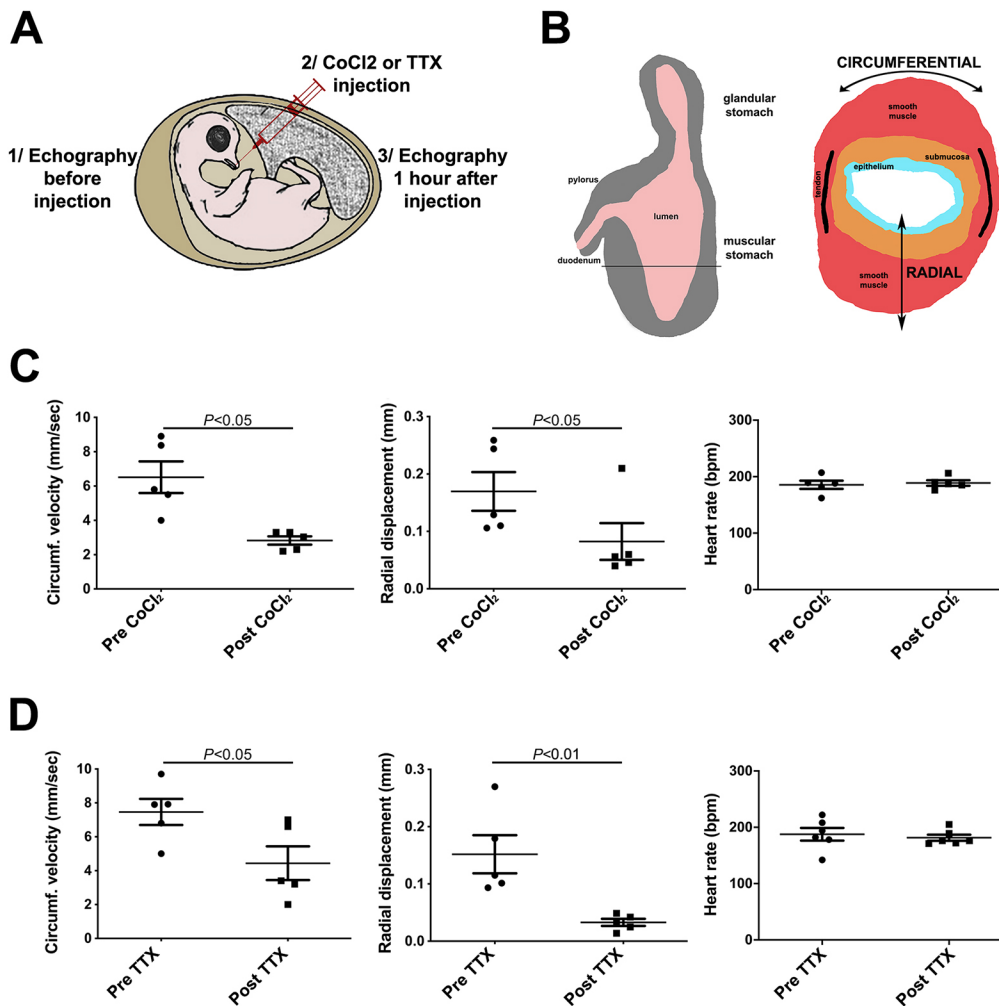

**Fig. 3. Monitoring stomach contractile activity in E15 chick stomach.** (A) Schematic of the method used to target the GI tract with drugs. (B) Schematic of the speckle tracking analysis of stomach during chick embryo development. (C) Effect of cobalt chloride (10  $\mu$ M; CoCl<sub>2</sub>) on stomach circumferential strain velocity, stomach radial strain changes and heart rate in E15 chick embryos ( $n=5$ ). (D) Effect of tetrodotoxin (25  $\mu$ M; TTX) on stomach circumferential strain velocity, stomach radial strain changes and heart rate in E15 embryos ( $n=5$ ). Data are mean $\pm$ s.e.m. Paired two-tailed  $t$ -test.

of the BMP ligand, *BAPX1* is expressed in the vertebrate distal stomach mesenchyme (Faure et al., 2013; Nielsen et al., 2001; Verzi et al., 2009). As previously reported, *BAPX1* negatively regulates *BMP4* and *BMP2* expression (Fig. S3A) and consequently BMP activity in the stomach mesenchyme (Fig. S3B), resulting in the expansion of the gastric and duodenal mesenchyme mass (De Santa Barbara et al., 2005; Nielsen et al., 2001) and in the increase of SMC proliferation (Fig. S3C). However, *BAPX1* functions in stomach smooth muscle differentiation have not been investigated yet. Therefore, to evaluate the impact of BMP activity modulation on fetal stomach contractions, we used the avian replication-competent retroviral misexpression system to continuously and specifically express *BAPX1* in the developing stomach mesenchyme (Fig. S3D), as previously described (Faure et al., 2015; McKey et al., 2016). High-resolution echography showed that the *BAPX1*-expressing stomach lumen of E13 chick embryos was devoid of refringent content compared with E13 *GFP*-expressing stomach lumens (controls) (Fig. 4A, compare white and yellow arrows). Moreover, *BAPX1*-expressing stomachs were hypotonic compared with controls and did not show a rhythmic muscular deformation and displacement (Movies 6 and 7). Using speckle tracking analysis, we found that the stomach circumferential velocity ( $5.734 \pm 1.25$  mm/s in *BAPX1*-expressing and  $8.202 \pm 0.94$  mm/s in control stomachs,  $P < 0.05$ ) and radial displacement ( $0.065 \pm 0.025$  mm in *BAPX1*-expressing and  $0.1977 \pm 0.054$  mm in control stomachs,  $P < 0.01$ ) (Fig. 4B) were decreased in E13 *BAPX1*-expressing stomachs,

leading to stomach contraction inhibition. We then evaluated the effect of *BAPX1* expression on stomach morphology and smooth muscle differentiation status. *BAPX1* overexpression induced minor morphological defects in the distal and proximal stomach (gizzard and proventriculus in birds, respectively) at E13 (Fig. 4C, upper panels). We confirmed the mesenchyme targeting by *BAPX1*- and *GFP*-expressing (control) retroviruses using anti-gag antibodies (Fig. 4C, lower panels; Fig. S3D). We detected the smooth muscle marker gamma smooth muscle actin ( $\gamma$ SMA) by immunostaining in transversal paraffin sections of E13 control and *BAPX1*-expressing stomachs, suggesting that the induction of contractile proteins in smooth muscle was not impaired (Fig. 4D; Fig. S3E). However, in *BAPX1*-expressing stomachs, the fiber structure was disorganized (Fig. 4D; Fig. S3E, compare white and red arrows). Expression of the pan-neuronal B3-tubulin (TUJ1) marker indicated that enteric neurons were present in both conditions (Fig. 4D; Fig. S3E). To better characterize the smooth muscle organization, we modified and optimized the RapiClear<sup>®</sup> tissue-clearing protocol to obtain whole translucent stomachs. We assessed the 3D impact of *BAPX1* overexpression using light-sheet microscopy. In E13 control stomach samples, 3D analysis of  $\gamma$ SMA expression highlighted the presence of several muscle bundles organized in parallel fibers with an orthogonal orientation in the most posterior part of the stomach (Fig. 4E, white arrow in the dorsal view; Movie 8). Like in control samples, in E13 *BAPX1*-expressing stomach samples, muscle bundles were organized in parallel fibers. However, the

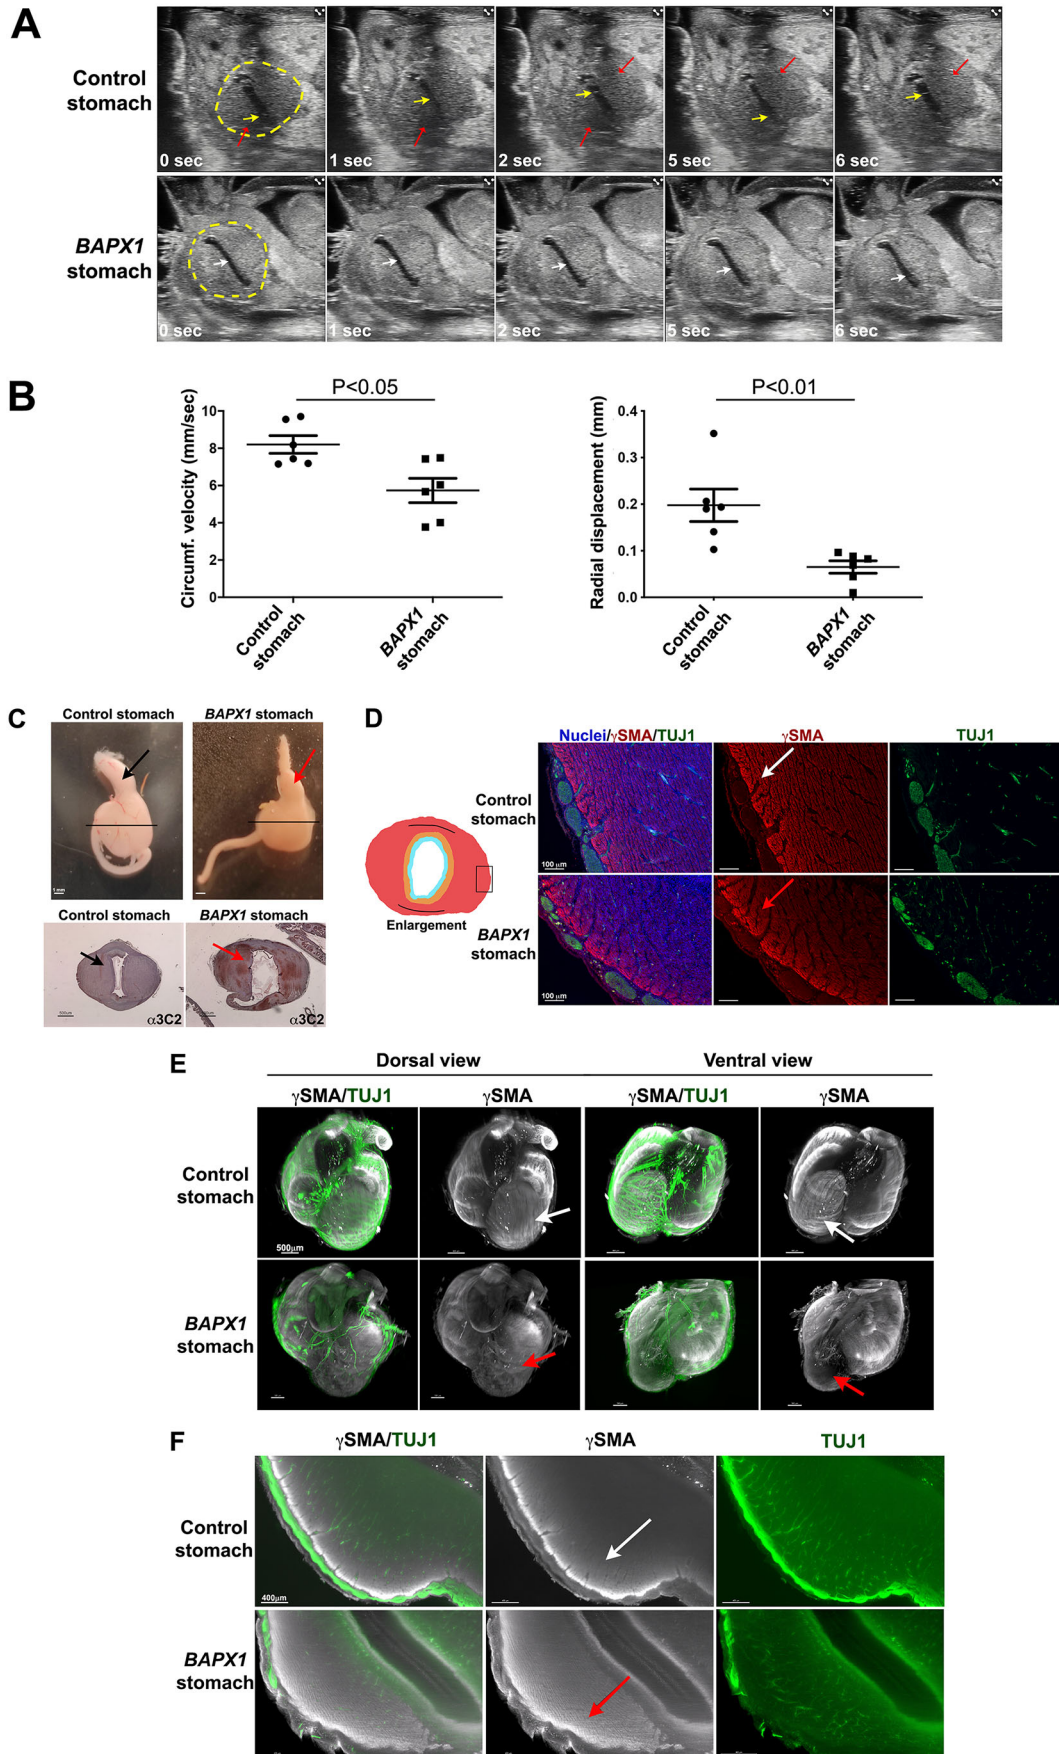

Fig. 4. See next page for legend.

**Fig. 4. Interfering *in vivo* with the BMP signaling pathway affects stomach contractility in chick embryos.** (A) Observation of stomach contractions *in vivo* using high-resolution echography in E13 control and *BAPX1*-overexpressing stomachs. Dashed line, E13 stomach; yellow arrows, refringent content (food) in the E13 control stomach lumen; white arrows, absence of refringent content (food) in *BAPX1*-overexpressing stomach lumen; red arrows, muscle movement in the control E13 stomach. (B) Speckle tracking analysis to evaluate the impact of *BAPX1* expression on stomach circumferential strain velocity and radial strain changes in E13 chick embryos ( $n=6$ ). Data are mean $\pm$ s.e.m. Unpaired two-tailed *t*-test. (C) Effect of *BAPX1* expression on E13 *BAPX1*-expressing stomach gross morphology compared with control E13 stomach (upper panels; ventral view). Red and black arrows indicate the resulting proventriculus. Transversal paraffin sections of E13 control and *BAPX1*-expressing stomachs analyzed by immunohistochemistry with an anti-gag (3C2) antibody (lower panel). Red arrows indicate *BAPX1* expression in the E13 *BAPX1*-expressing stomach. (D) Transversal paraffin sections of E13 *BAPX1*-expressing and control stomachs located in the external part of the stomach (box drawn in the schematic on left). Nuclei were visualized with Hoechst. Antibodies against smooth muscle cells ( $\gamma$ SMA) and neuronal cells (TUJ1) were used. (E) Light-sheet microscopy analysis after RapiClear<sup>®</sup> tissue clearing and  $\gamma$ SMA and TUJ1 immunofluorescence staining of E13 whole control and *BAPX1*-expressing stomachs. White and red arrows indicate smooth muscle fiber organization in Control and *BAPX1*-expressing stomachs. (F) Virtual longitudinal sections of whole E13 *BAPX1*-expressing and Control stomachs stained for  $\gamma$ SMA and TUJ1. White and red arrows indicate difference in circular muscle fiber orientation. Scale bars: 500  $\mu$ m (C,E); 100  $\mu$ m (D); 400  $\mu$ m (F).

orthogonal orientation of the second muscle layer was altered: fibers were present, but harbored multiple orientations (Fig. 4E, red arrow in the ventral view; Movie 9). *BAPX1* expression also led to the inversion of the muscle bundle orientation (Fig. 4E, compare red and white arrows in the dorsal view). The changes in the muscle fiber orientation observed in whole *BAPX1*-expressing stomach samples were confirmed in virtual sections (Fig. 4F, compare red and white arrows). As intestinal smooth muscle differentiation contributes to ENS organization (Graham et al., 2017), we also examined the neuronal network. The ENS network spread in the smooth muscle layer sparing the tendons (Fig. 4E,F; Movie 8) (Le Guen et al., 2009). However, the neuronal mesh was less dense and less interconnected in E13 *BAPX1*-expressing stomachs, in which we observed disorganized smooth muscle bundles (Fig. 4E,F; Movie 9). Altogether, the combination of high-resolution echography *in vivo* imaging, gain-of-function approach and 3D tissue-clearing immunofluorescence allowed us to demonstrate that BMP signaling deregulation in the stomach mesenchyme alters the segmental orientation of the smooth muscle layers, a feature associated with impaired fetal motility.

## DISCUSSION

Using an approach that combines *in vivo* non-invasive high-resolution echography imaging and speckle-tracking analysis, we characterized GI motility patterns during chick embryo development. We adapted and validated this approach, which is mainly used in cardiovascular physiopathology, for perinatal gastroenterology investigations using chick embryos, a vertebrate model that allows the longitudinal investigation of all GI domains.

Our *in vivo* approach allowed us to show that the early erratic contractions of the stomach musculature observed at E8 became synchronized at E15. Investigation of other segments of the developing GI tract highlighted differences in motility onset along the AP axis. Like in the stomach, colon motility became fully efficient at E15. Conversely, the small intestine motility was effective at E13, as indicated by the presence of efficient waves of

peristalsis. The timing of efficient intestinal motility coincides with the appearance of the longitudinal smooth muscle layer in the chick small intestine (Shyer et al., 2013), suggesting the requirement of the second smooth muscle layer for efficient contractions. The onset of GI smooth muscle differentiation and its regional differences have been previously described in the chick embryo (Bourret et al., 2017; Graham et al., 2017). Conversely, the precise timing of the sequential differentiation of the distinct smooth muscle layers along the AP of the GI tract was unknown. Our functional observations support regional differences in the appearance of the longitudinal smooth muscle layer.

Most of the GI variation among vertebrate species concerns the stomach morphology and can be correlated with their diverse diets. However, the global molecular patterning of the GI tract is remarkably similar among the different vertebrate lineages (Smith et al., 2000). Stomach development and its specific morphogenesis have been extensively studied in several animal models (reviewed by Grapin-Botton, 2005; Kim and Shivdasani, 2016; Le Guen et al., 2015; McLin et al., 2009), but few studies have addressed the development of motor skills in organ culture, and even fewer *in vivo*. The human stomach musculature consists of two smooth muscle layers, an external longitudinal and internal circular muscle layer, for most of its extent. In addition, there is an oblique muscle layer, internal to the circular muscle layer, in the gastro-esophageal junction region (Di Natale et al., 2022; Hur, 2020). Adult gastric movements depend on the generation of electrical rhythmicity and electrical conduction. The directions and strengths of the forces generated when the muscle is excited depend on the organization of the musculature. However, there is no detailed quantitative data on vertebrate stomach musculature organization, although innervation has been extensively described (Furness et al., 2020). Using the high-resolution echography/speckle tracking approach and pharmacological inhibitors, we found that stomach contractions are controlled by enteric neurons at E15. This suggests the importance of the establishment of stomach contraction to ensure the fetal transit that is also essential for fetus growth. Using a genetic approach, we then showed that deregulation of the BMP pathway activity affects the organization of the longitudinal smooth muscle layer and its orientation relative to the circular layer, but not gastric smooth muscle differentiation and the oblique smooth muscle layer. The high-resolution echography/speckle tracking approach in *BAPX1*-expressing embryos allowed us to detect *in vivo* a functional alteration that impaired contraction, despite the effective smooth muscle cell differentiation, highlighting the importance of this new approach.

Our data demonstrated differences in peristalsis onset along the AP axis at a developmental stage that in the human embryo corresponds to 12 and 14 weeks of gestation. The pediatric Chronic Intestinal Pseudo-Obstruction (CIPO) syndrome is the most severe functional gastrointestinal disorder (high morbidity and mortality rates), but lacks standardized diagnostic and therapeutic approaches (Thapar et al., 2018). Recently, it was reported that the *ACTG2* gene, which encodes  $\gamma$ SMA, is mutated in 30% of children with CIPO who have a worse outcomes and the severe GI dysmotility often associated with the presence of megacystis (Hashmi et al., 2021; Matera et al., 2016). In pediatric patients with CIPO, prenatal signs are detected only in ~20% of cases, mainly the presence of megacystis, although 50-70% of affected infants show clinical signs in the first month after birth (Di Nardo et al., 2017). Multi-visceral dilation has been observed in two fetuses with CIPO, using standard ultrasonography, (Shen et al., 2007). This suggests that the non-invasive high-resolution echography approach could be useful to

easily and routinely assess digestive function in fetuses before birth. However, routine ultrasound examination to detect GI dysmotility is not part of the recent antenatal recommendations (Thapar et al., 2018).

Altogether, we demonstrated that GI contractions occur during fetal development and progress from an uncoordinated pattern to a more powerful coordinated profile, showing that the intrinsic and extrinsic innervation influence embryonic peristalsis.

## MATERIALS AND METHODS

### Animal model and ultrasound data acquisition and analysis

Fertilized White Leghorn chicken eggs (Les Bruyères, Dangers, France) were incubated at 38°C in a humidified incubator (SMA Coudelou, France) until use. Although experiments using chick embryos do not require approval by an ethic committee (European law, article 2016/63/UE), they were performed in accordance with the INSERM and CNRS ethics guidelines for animal experimentation. After 2 days of incubation, 4 ml of albumin was removed and a hole was made and sealed with tape to avoid the formation of vessels on the shell top. Briefly, eggs were taken out of the incubator and held under a bright light to localize the embryo. Then, a window of approximately 1.5×1.5 cm was sawn in the eggshell. The eggshell and outer membrane were removed to visualize the embryo that was staged by microscopic examination according to Hamburger and Hamilton (1951) and Southwell (2006). Embryos that were dysmorphic or showed visible bleeding were excluded. E8 (stage 34), E13 (stage 39) and E15 (stage 41) embryos were studied *in vivo* ( $n=6$  embryos per stage). At these stages, embryos float on the left side in the egg yolk. During ultrasonography, each egg was positioned in a dry block heater filled with sand to maintain the temperature of 38°C inside the egg. The Vevo2100 and Vevo3100 (Visualsonics) ultrasound systems with 40 MHz probes (MS550D and MX550D) were used for *in vivo* image acquisition (spatial resolution of 40 μm). Briefly, the probe was delicately positioned on the eggshell window using an adjustable stand and transducer mount. B-Mode was used to record 2D images of the GI tract for 1 min at 25 images/sec. As ultrasound image acquisition of the embryos was performed without anesthesia, the embryo could move in its shell. For this reason, movies were recorded for several minutes, but the movements of the GI tract were analyzed using only the sections where the embryo was not moving. For the small intestine evaluation, 3-5 sections per embryo were analyzed to obtain a mean value for minimizing size variability. B-mode videos were transferred to ImageJ to measure the cross-sectional area and diameter. The speckle tracking analysis software (VevoLab 5.6.1) was used offline to analyze the GI tissue motion by tracking natural acoustic reflection interference, also called speckle pattern. The speckle tracking algorithm used in this study allowed us to calculate and to quantify the maximum regional (stomach, intestine and colon) velocity, displacement and strain from E8 to E15. Strain is defined as the relative change in length, and is determined with the formula  $\epsilon=(L-L_0)/L_0$  where  $L_0$  is the baseline length and  $L$  is the length at maximum contraction. The circumferential strain, radial strain and longitudinal strain identify the contraction along the circular outline, the organ thickening and the length change relative to the original organ length, respectively. It should be noted that our strain values are likely to be underestimated due to the use of Lagrangian linear methods. Statistical analyses were carried out using Prism 8 software and one-way ANOVA with Tukey's multiple comparison test and a single pool of variance.

### Pharmacological inhibition

To deliver specific compounds in the GI tract, an intra-oral administration technique was developed. To allow the access to the beak of E15 embryos, a high temperature cautery handle (Bovie Medical Corporation, FST) was used to open a small window without bleeding into the extra-embryonic membranes close to the beak. To validate this approach, Evans Blue solution was deposited directly in the E15 chick embryo beak with a capillary pipette and 1 h later the dye was detected in the stomach lumen (Fig. S1). The sodium channel blocker TTX (1 mM stock solution, Tocris) was used to block neurotransmission (D'Antona et al., 2001) and the calcium channel blocker  $\text{CoCl}_2$  (0.1 M stock solution, Sigma-Aldrich) was used to block

smooth muscle contraction (de Moraes and Carvalho, 1969). Imatinib mesylate (STI571) (10 mM stock solution, Euromedex) was used to block the receptor tyrosine kinase protein KIT and ICC activity (Beckett et al., 2007; Chevalier et al., 2020). Drugs were diluted to the final concentration by adding sterile PBS. Before drug administration, the stomach and heart of each E15 embryo were evaluated using high-resolution echography. This was followed by intra-oral administration of 100 μl of 25 μM TTX, 100 μl of 10 μM  $\text{CoCl}_2$ , 100 μl of 20 μM imatinib or 100 μl of PBS (control). To determine TTX optimal concentration that leads to reproducible stomach motility inhibition without any effect on heart rate (i.e. 25 μM), 1, 10, 25 and 50 μM were tested in preliminary experiments. Using fine tools and syringes, the solution was dropped in the beak, and each egg was put back in the incubator to allow the drug progression to the GI tract. After 1 h, each egg was evaluated using high-resolution echography, as previously described. Following this protocol, we also evaluated and found that intra-oral administration of PBS alone did not affect GI motility compared with untreated E15 embryos (Fig. S2A). Five embryos per stage were studied without exclusion criteria. The paired two-tailed *t*-test was calculated with the Prism 8 software.

### Avian retroviral misexpression system, RapiClear® tissue clearing and light-sheet microscopy analysis

Fertilized White Leghorn eggs were incubated at 38°C in humidified incubators. The vector to produce replication-competent retroviruses (RCAS) has been previously described (Le Guen et al., 2009; Moniot et al., 2004). The DF-1 chicken fibroblast cell line (ATCC-LGC) was transfected with RCAS-based constructs to produce retroviruses that express GFP (Moniot et al., 2004) or BAPX1 (De Santa Barbara et al., 2005; Nielsen et al., 2001). GFP-expressing retroviruses alone (as control) or a mix of BAPX1+GFP-expressing retroviruses were injected in the splanchnopleural mesoderm of stage 10 chick embryos to target the stomach mesenchyme (Le Guen et al., 2009; Moniot et al., 2004; Notarnicola et al., 2012; Roberts et al., 1998). This direct splanchnopleural mesoderm injection and the specific tropism of retroviruses for mesenchymal cells prevent the targeting of vENCDCs and epithelium (Faure et al., 2015; Fig. S3D). Eggs were then placed at 38°C until high-resolution echography followed by dissection. Only GFP-positive stomachs were analyzed by high-resolution echography and underwent RapiClear® tissue clearing.

For immunofluorescence of paraffin sections, stomachs were gradually dehydrated in ethanol and embedded in paraffin; 10 μm sections were cut using a microtome and collected on poly-L-lysine-coated slides (Thermo Fisher Scientific) for immunofluorescence (Faure et al., 2013) using rabbit anti-γSMA (MyBioSource, MBS820899, 1:500), rabbit phospho-histone H3-Ser10 (PH3) (Millipore, 06-570, 1:500) and mouse anti-TUJ1 (Covance, MMS-435P, 1:800) antibodies. Nuclei were stained with Hoechst 33342 (Molecular Probes). Cells were imaged using a Zeiss AxioVision fluorescence microscope using standard filters, or a ZEISS LSM800 confocal laser-scanning microscope.

For tissue clearing, GI tissues were fixed at room temperature (RT) on an orbital shaker in 4% paraformaldehyde for 2 h, and then washed in PBS for 1 h. Samples were transferred to 2% Triton X-100 in PBS solution (containing 0.05% sodium azide) for permeabilization at RT on an orbital shaker for 1-2 days, and then washed three times for 15 min in PBS at RT. Samples were incubated at 4°C on an orbital shaker in blocking solution (10% normal donkey serum, 1% Triton X-100, 0.2% sodium azide in PBS) for 2 days, followed by incubation with primary antibodies (rabbit anti-γSMA, 1:300, and mouse anti-TUJ1, 1:200) in antibody dilution buffer (1% normal donkey serum, 0.2% Triton X-100, 0.2% sodium azide in PBS) at 4°C on an orbital shaker for 3-4 days. Then, samples were washed with washing buffer (3% NaCl, 0.2% Triton X-100 in PBS) on an orbital shaker three times at RT for 1 h and then at 4°C overnight. Samples were incubated with the anti-rabbit Alexa Fluor 647 (Invitrogen, A31573 1:300) and anti-mouse Alexa Fluor 568 (Invitrogen, A10037, 1:300) secondary antibodies in dilution buffer at 4°C on an orbital shaker for 2 days. Samples were washed with washing buffer on an orbital shaker at RT three times for 1 h and then at 4°C overnight. This was followed by three washes with PBS for 15 min each and sample clearing with RapiClear® at RT overnight. Cleared specimens were placed in 2,2'-thiodiethanol solution (Sigma-Aldrich,



166782) and tissues were imaged using light-sheet microscopy (UltraMicroscope Blaze, Miltenyi Lavis BioTec), a 2× objective (MVPLAPO Olympus) and 0.5× numerical aperture. Images were analyzed using Imaris.

#### Acknowledgements

The authors thank the members of the 'Development of visceral smooth muscle and associated pathologies' team (PhyMedExp), Patrice Bideaux for technical assistance, Emilie Josse for graphical art, the Imagerie du Petit Animal de Montpellier (IPAM, Biocampus Montpellier) for access to high-resolution ultrasound (LRQA Iso9001; France Life Imaging, grant ANR-11-INBS-0006; IBISA; Fondation Leducq, grant RETP, I-Site Muse) and Montpellier Ressources Imagerie for access to light-sheet microscopy (M.-P. Blanchard, A. Sarrazin and O. Faklaris, MRI, Biocampus, Montpellier) facilities.

#### Competing interests

The authors declare no competing or financial interests.

#### Author contributions

Conceptualization: P.S., S.F., J.T., S.E.L., N.C., P.d.S.B.; Methodology: P.S., A.F.; Formal analysis: P.S., S.F.; Investigation: P.S., A.F., S.F., N.C.; Writing - original draft: P.d.S.B.; Writing - review & editing: P.S., A.F., S.F., J.T., S.E.L., N.C., P.d.S.B.; Visualization: A.F.; Supervision: P.d.S.B.; Project administration: P.d.S.B.; Funding acquisition: S.F., P.d.S.B.

#### Funding

This work was supported by the French Patients' Association POIC, FIMATHO (2021), Agence Nationale de la Recherche [ANR-17-CE14-0043 (PAPIS) to P.d.S.B.], and the Association Française contre les Myopathies [No 23800 and ANR-21-CE14-0017 (NeuroPIMM) to S.F.].

#### Peer review history

The peer review history is available online at <https://journals.biologists.com/dev/article-lookup/doi/10.1242/dev.200625>.

#### References

- Barnes, K. J., Beckett, E. A., Brookes, S. J., Sia, T. C. and Spencer, N. J. (2014). Control of intrinsic pacemaker frequency and velocity of colonic migrating motor complexes in mouse. *Front. Neurosci.* **8**, 96. doi:10.3389/fnins.2014.00096
- Beckett, E. A. H., Ro, S., Bayguinov, Y., Sanders, K. M. and Ward, S. M. (2007). Kit signaling is essential for development and maintenance of interstitial cells of Cajal and electrical rhythmicity in the embryonic gastrointestinal tract. *Dev. Dyn.* **236**, 60-72. doi:10.1002/dvdy.20929
- Bourret, A., Chauvet, N., de Santa Barbara, P. and Faure, S. (2017). Colonic mesenchyme differentiates into smooth muscle before its colonization by vagal enteric neural crest-derived cells in the chick embryo. *Cell Tissue Res.* **368**, 503-511. doi:10.1007/s00441-017-2577-0
- Burns, A. J. and Le Douarin, N. M. (1998). The sacral neural crest contributes neurons and glia to the post-umbilical gut: spatiotemporal analysis of the development of the enteric nervous system. *Development* **125**, 4335-4347. doi:10.1242/dev.125.21.4335
- Burns, A. J., Champeval, D. and Le Douarin, N. M. (2000). Sacral neural crest cells colonise aganglionic hindgut in vivo but fail to compensate for lack of enteric ganglia. *Dev. Biol.* **219**, 30-43. doi:10.1006/dbio.1999.9592
- Burns, A. J., Roberts, R. R., Bornstein, J. C. and Young, H. M. (2009). Development of the enteric nervous system and its role in intestinal motility during fetal and early postnatal stages. *Semin. Pediatr. Surg.* **18**, 196-205. doi:10.1053/j.sempedsurg.2009.07.001
- Chevalier, N. R. (2018). The first digestive movements in the embryo are mediated by mechanosensitive smooth muscle calcium waves. *Philos. Trans. R. Soc. Lond. B Biol. Sci.* **373**, 20170322. doi:10.1098/rstb.2017.0322
- Chevalier, N. R., Fleury, V., Dufour, S., Proux-Gillardeaux, V. and Asnacios, A. (2017). Emergence and development of gut motility in the chicken embryo. *PLoS ONE* **12**, e0172511. doi:10.1371/journal.pone.0172511
- Chevalier, N. R., Dacher, N., Jacques, C., Langlois, L., Guedj, C. and Faklaris, O. (2019). Embryogenesis of the peristaltic reflex. *J. Physiol.* **597**, 2785-2801. doi:10.1113/JP277746
- Chevalier, N. R., Ammouche, Y., Gomis, A., Teyssaire, C., de Santa Barbara, P. and Faure, S. (2020). Shifting into high gear: how interstitial cells of Cajal change the motility pattern of the developing intestine. *Am. J. Physiol. Gastrointest. Liver Physiol.* **319**, G519-G528. doi:10.1152/ajpgi.00112.2020
- D'Antona, G., Hennig, G. W., Costa, M., Humphreys, C. M. and Brookes, S. J. H. (2001). Analysis of motor patterns in the isolated guinea-pig large intestine by spatio-temporal maps. *Neurogastroenterol. Motil.* **13**, 483-492. doi:10.1046/j.1365-2982.2001.00282.x
- De Corte, W., Delrue, H., Vanfleteren, L. J., Dutré, P. E. M., Pottel, H., Devriendt, D. K. J. C., Van Rooy, F. H. E. C., D'Hondt, M., Carlier, S. and Desmet, M. B. (2012). Randomized clinical trial on the influence of anaesthesia protocol on intestinal motility during laparoscopic surgery requiring small bowel anastomosis. *Br. J. Surg.* **99**, 1524-1529. doi:10.1002/bjs.8883
- de Moraes, S. and Carvalho, F. V. (1969). Cobalt ion and the mechanical response of the depolarized smooth muscle. *Pharmacology* **2**, 230-236. doi:10.1159/000136023
- de Santa Barbara, P., van den Brink, G. R. and Roberts, D. J. (2002). Molecular etiology of gut malformations and diseases. *Am. J. Med. Genet.* **115**, 221-230. doi:10.1002/ajmg.10978
- de Santa Barbara, P., van den Brink, G. R. and Roberts, D. J. (2003). Development and differentiation of the intestinal epithelium. *Cell. Mol. Life Sci.* **60**, 1322-1332. doi:10.1007/s00018-003-2289-3
- De Santa Barbara, P., Williams, J., Goldstein, A. M., Doyle, A. M., Nielsen, C., Winfield, S., Faure, S. and Roberts, D. J. (2005). Bone morphogenetic protein signaling pathway plays multiple roles during gastrointestinal tract development. *Dev. Dyn.* **234**, 312-322. doi:10.1002/dvdy.20554
- Di Nardo, G., Di Lorenzo, C., Lauro, A., Stanghellini, V., Thapar, N., Karunaratne, T. B., Volta, U. and De Giorgio, R. (2017). Chronic intestinal pseudo-obstruction in children and adults: diagnosis and therapeutic options. *Neurogastroenterol. Motil.* **29**, e12956. doi:10.1111/nmo.12956
- Di Natale, M. R., Patten, L., Molero, J. C., Stebbing, M. J., Hunne, B., Wang, X., Liu, Z. and Furness, J. B. (2022). Organisation of the musculature of the rat stomach. *J. Anat.* **240**, 711-723. doi:10.1111/joa.13587
- Fairman, C. L., Clagett-Dame, M., Lennon, V. A. and Epstein, M. L. (1995). Appearance of neurons in the developing chick gut. *Dev. Dyn.* **204**, 192-201. doi:10.1002/aja.1002040210
- Faure, S., Georges, M., McKey, J., Sagnol, S. and de Santa Barbara, P. (2013). Expression pattern of the homeotic gene *Bapx1* during early chick gastrointestinal tract development. *Gene Expr. Patterns* **13**, 287-292. doi:10.1016/j.gep.2013.05.005
- Faure, S., McKey, J., Sagnol, S. and de Santa Barbara, P. (2015). Enteric neural crest cells regulate vertebrate stomach patterning and differentiation. *Development* **142**, 331-342. doi:10.1242/dev.118422
- Furness, J. B., Di Natale, M., Hunne, B., Oparija-Rogenmozere, L., Ward, S. M., Sasse, K. C., Powley, T. L., Stebbing, M. J., Jaffey, D. and Fothergill, L. J. (2020). The identification of neuronal control pathways supplying effector tissues in the stomach. *Cell Tissue Res.* **382**, 433-445. doi:10.1007/s00441-020-03294-7
- Graham, H. K., Maina, I., Goldstein, A. M. and Nagy, N. (2017). Intestinal smooth muscle is required for patterning the enteric nervous system. *J. Anat.* **230**, 567-574. doi:10.1111/joa.12583
- Grapin-Botton, A. (2005). Antero-posterior patterning of the vertebrate digestive tract: 40 years after Nicole Le Douarin's PhD thesis. *Int. J. Dev. Biol.* **49**, 335-347. doi:10.1387/ijdb.041946ag
- Hamburger, V. and Hamilton, H. L. (1951). A series of normal stages in the development of the chick embryo. *J. Morphol.* **88**, 49-92. doi:10.1002/jmor.1050880104
- Hashmi, S. K., Ceron, R. H. and Heuckeroth, R. O. (2021). Visceral myopathy: clinical syndromes, genetics, pathophysiology, and fall of the cytoskeleton. *Am. J. Physiol. Gastrointest. Liver Physiol.* **320**, G919-G935. doi:10.1152/ajpgi.00066.2021
- Heaneu, T. A., Shepherd, I. T. and Burns, A. J. (2016). Enteric nervous system development in avian and zebrafish models. *Dev. Biol.* **417**, 129-138. doi:10.1016/j.ydbio.2016.05.017
- Hur, M.-S. (2020). Muscular architecture of the abdominal part of the esophagus and the stomach. *Clin. Anat.* **33**, 530-537. doi:10.1002/ca.23427
- Huycke, T. R., Miller, B. M., Gill, H. K., Nerurkar, N. L., Sprinzak, D., Mahadevan, L. and Tabin, C. J. (2019). Genetic and mechanical regulation of intestinal smooth muscle development. *Cell* **179**, 90-105.e21. doi:10.1016/j.cell.2019.08.041
- Kim, T.-H. and Shivasani, R. A. (2016). Stomach development, stem cells and disease. *Development* **143**, 554-565. doi:10.1242/dev.124891
- Kim, B. J., Chae, H., Kwon, Y. K., Choi, S., Jun, J. Y., Jeon, J.-H., So, I. and Kim, S. J. (2010). Effects of imatinib mesylate in interstitial cells of Cajal from murine small intestine. *Biol. Pharm. Bull.* **33**, 993-997. doi:10.1248/bpb.33.993
- Koppen, I. J. N., Benninga, M. A. and Singendonk, M. M. J. (2017). Motility disorders in infants. *Early Hum. Dev.* **114**, 1-6. doi:10.1016/j.earlhumdev.2017.09.005
- Le Douarin, N. M. and Teillet, M.-A. (1973). The migration of neural crest cells to the wall of the digestive tract in avian embryo. *J. Embryol. Exp. Morphol.* **30**, 31-48. doi:10.1242/dev.30.1.31
- Le Guen, L., Notarnicola, C. and de Santa Barbara, P. (2009). Intermuscular tendons are essential for the development of vertebrate stomach. *Development* **136**, 791-801. doi:10.1242/dev.029942
- Le Guen, L., Marchal, S., Faure, S. and de Santa Barbara, P. (2015). Mesenchymal-epithelial interactions during digestive tract development and epithelial stem cell regeneration. *Cell. Mol. Life Sci.* **72**, 3883-3896. doi:10.1007/s00018-015-1975-2

- Lecoin, L., Gabella, G. and Le Douarin, N.** (1996). Origin of the c-kit-positive interstitial cells in the avian bowel. *Development* **122**, 725-733. doi:10.1242/dev.122.3.725
- Martire, D., Garnier, S., Sagnol, S., Bourret, A., Marchal, S., Chauvet, N., Guérin, A., Forgues, D., Berrebi, D., Chardot, C. et al.** (2021). Phenotypic switch of smooth muscle cells in paediatric chronic intestinal pseudo-obstruction syndrome. *J. Cell. Mol. Med.* **25**, 4028-4039. doi:10.1111/jcmm.16367
- Matera, I., Rusmini, M., Guo, Y., Lerone, M., Li, J., Zhang, J., Di Duca, M., Nozza, P., Mosconi, M., Pini Prato, A. et al.** (2016). Variants of the ACTG2 gene correlate with degree of severity and presence of megacystis in chronic intestinal pseudo-obstruction. *Eur. J. Hum. Genet.* **24**, 1211-1215. doi:10.1038/ejhg.2015.275
- McKey, J., Martire, D., de Santa Barbara, P. and Faure, S.** (2016). LIX1 regulates YAP1 activity and controls the proliferation and differentiation of stomach mesenchymal progenitors. *BMC Biol.* **14**, 34. doi:10.1186/s12915-016-0257-2
- McClain, C. R.** (1963). Amniography studies of the gastrointestinal motility of the human fetus. *Am. J. Obstet. Gynecol.* **86**, 1079-1087. doi:10.1016/S0002-9378(16)35300-5
- McLin, V. A., Henning, S. J. and Jamrich, M.** (2009). The role of the visceral mesoderm in the development of the gastrointestinal tract. *Gastroenterology* **136**, 2074-2091. doi:10.1053/j.gastro.2009.03.001
- McQuinn, T. C., Bratoeva, M., Dealmeida, A., Remond, M., Thompson, R. P. and Sedmera, D.** (2007). High-frequency ultrasonographic imaging of avian cardiovascular development. *Dev. Dyn.* **236**, 3503-3513. doi:10.1002/dvdy.21357
- Mittal, R. K., Padda, B., Bhalla, V., Bhargava, V. and Liu, J.** (2006). Synchrony between circular and longitudinal muscle contractions during peristalsis in normal subjects. *Am. J. Physiol. Gastrointest. Liver Physiol.* **290**, G431-G438. doi:10.1152/ajpgi.00237.2005
- Moniot, B., Biau, S., Faure, S., Nielsen, C. M., Berta, P., Roberts, D. J. and de Santa Barbara, P.** (2004). SOX9 specifies the pyloric sphincter epithelium through mesenchymal-epithelial signals. *Development* **131**, 3795-3804. doi:10.1242/dev.01259
- Nielsen, C., Murtaugh, L. C., Chyung, J. C., Lassar, A. and Roberts, D. J.** (2001). Gizzard formation and the role of Bapx1. *Dev. Biol.* **231**, 164-174. doi:10.1006/dbio.2000.0151
- Notarnicola, C., Rouleau, C., Le Guen, L., Virsolvy, A., Richard, S., Faure, S. and De Santa Barbara, P.** (2012). The RNA-binding protein RBPMS2 regulates development of gastrointestinal smooth muscle. *Gastroenterology* **143**, 687-697.e9. doi:10.1053/j.gastro.2012.05.047
- Popescu, L. M., Vidulescu, C., Curici, A., Caravia, L., Simionescu, A. A., Ciontea, S. M. and Simion, S.** (2006). Imatinib inhibits spontaneous rhythmic contractions of human uterus and intestine. *Eur. J. Pharmacol.* **546**, 177-181. doi:10.1016/j.ejphar.2006.06.068
- Roberts, D. J.** (2000). Molecular mechanisms of development of the gastrointestinal tract. *Dev. Dyn.* **219**, 109-120. doi:10.1002/1097-0177(2000)9999:9999<::AID-DVDY1047>3.3.CO;2-Y
- Roberts, D. J., Smith, D. M., Goff, D. J. and Tabin, C. J.** (1998). Epithelial-mesenchymal signaling during the regionalization of the chick gut. *Development* **125**, 2791-2801. doi:10.1242/dev.125.15.2791
- Roberts, R. R., Ellis, M., Gwynne, R. M., Bergner, A. J., Lewis, M. D., Beckett, E. A., Bornstein, J. C. and Young, H. M.** (2010). The first intestinal motility patterns in fetal mice are not mediated by neurons or interstitial cells of Cajal. *J. Physiol.* **588**, 1153-1169. doi:10.1113/jphysiol.2009.185421
- Sase, M., Tamura, H., Ueda, K. and Kato, H.** (1999). Sonographic evaluation of antepartum development of fetal gastric motility. *Ultrasound Obstet. Gynecol.* **13**, 323-326. doi:10.1046/j.1469-0705.1999.13050323.x
- Shen, O., Schimmel, M. S., Eitan, R., Granovsky-Grisaru, S. and Rabinowitz, R. R.** (2007). Prenatal diagnosis of intestinal pseudo-obstruction. *Ultrasound Obstet. Gynecol.* **29**, 229-231. doi:10.1002/uog.3895
- Shyer, A. E., Tallinen, T., Nerurkar, N. L., Wei, Z., Gil, E. S., Kaplan, D. L., Tabin, C. J. and Mahadevan, L.** (2013). Villification: how the gut gets its villi. *Science* **342**, 212-218. doi:10.1126/science.1238842
- Singendonk, M. M. J., Rommel, N., Omari, T. I., Benninga, M. A. and van Wijk, M. P.** (2014). Upper gastrointestinal motility: prenatal development and problems in infancy. *Nat. Rev. Gastroenterol. Hepatol.* **11**, 545-555. doi:10.1038/nrgastro.2014.75
- Smith, D. M., Grasty, R. C., Theodosiou, N. A., Tabin, C. J. and Nascone-Yoder, N. M.** (2000). Evolutionary relationships between the amphibian, avian, and mammalian stomachs. *Evol. Dev.* **2**, 348-359. doi:10.1046/j.1525-142x.2000.00076.x
- Southwell, B. R.** (2006). Staging of intestinal development in the chick embryo. *Anat. Rec. A Discov. Mol. Cell Evol. Biol.* **288A**, 909-920. doi:10.1002/ar.a.20349
- Thapar, N., Saliakellis, E., Benninga, M. A., Borrelli, O., Curry, J., Faure, C., De Giorgio, R., Gupte, G., Knowles, C. H., Staiano, A. et al.** (2018). Paediatric intestinal pseudo-obstruction: evidence and consensus-based recommendations from an ESPGHAN-Led Expert Group. *J. Pediatr. Gastroenterol. Nutr.* **66**, 991-1019. doi:10.1097/MPG.0000000000001982
- Uesaka, T., Young, H. M., Pachnis, V. and Enomoto, H.** (2016). Development of the intrinsic and extrinsic innervation of the gut. *Dev. Biol.* **417**, 158-167. doi:10.1016/j.ydbio.2016.04.016
- Verzi, M. P., Stanfel, M. N., Moses, K. A., Kim, B.-M., Zhang, Y., Schwartz, R. J., Shivdasani, R. A. and Zimmer, W. E.** (2009). Role of the homeodomain transcription factor Bapx1 in mouse distal stomach development. *Gastroenterology* **136**, 1701-1710. doi:10.1053/j.gastro.2009.01.009
- Wallace, A. S. and Burns, A. J.** (2005). Development of the enteric nervous system, smooth muscle and interstitial cells of Cajal in the human gastrointestinal tract. *Cell Tissue Res.* **319**, 367-382. doi:10.1007/s00441-004-1023-2
- Yntema, C. L. and Hammond, W. S.** (1954). The origin of intrinsic ganglia of trunk viscera from vagal neural crest in the chick embryo. *J. Comp. Neurol.* **101**, 515-541. doi:10.1002/cne.901010212
- Young, H. M., Ciampoli, D., Southwell, B. R. and Newgreen, D. F.** (1996). Origin of interstitial cells of Cajal in the mouse intestine. *Dev. Biol.* **180**, 97-107. doi:10.1006/dbio.1996.0287
